# Supplementary material for: Influences of high aspect ratio carbon nanotube network on normal stress difference measurements and extrusion behaviors for isotactic polypropylene nanocomposite melts
Source: Royal Society of Chemistry journal article supplement (doi:10.1039/c3ra44777d), 2013-11-28
Supplement: c3ra44777d.pdf [file c3ra44777d.pdf]

### Supplementary Information for

## Influences of high aspect ratio carbon nanotube network on normal stress differences measurements and extrusion behaviors for isotactic polypropylene nanocomposite melts†

Jingjing Yang, Yaqiong Zhang, Zhigang Wang,\* and Peng Chen

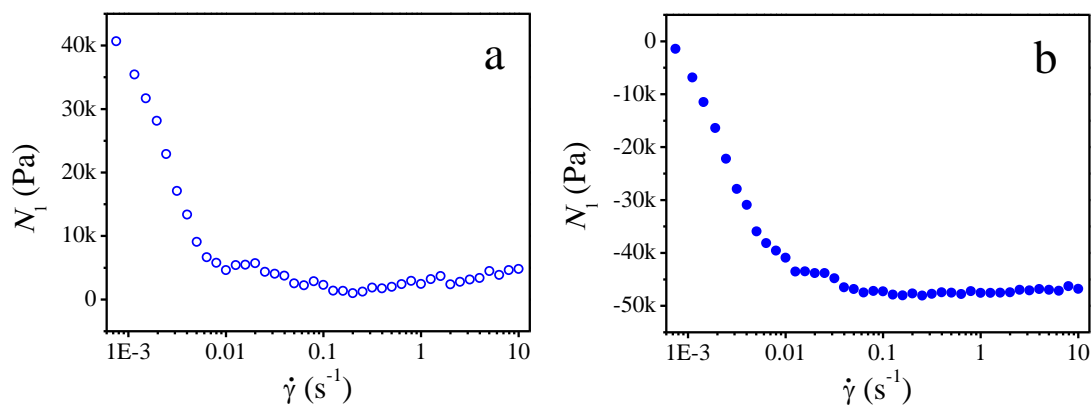

**Fig. S1** Changes of first normal stress difference,  $N_1$  with shear rate for the 5.0 wt% CNT/iPP nanocomposite in a cone-and-plate geometry for (a) without zeroing initial stresses induced by squeezing deformation, and (b) with zeroing initial stresses induced by squeezing deformation.

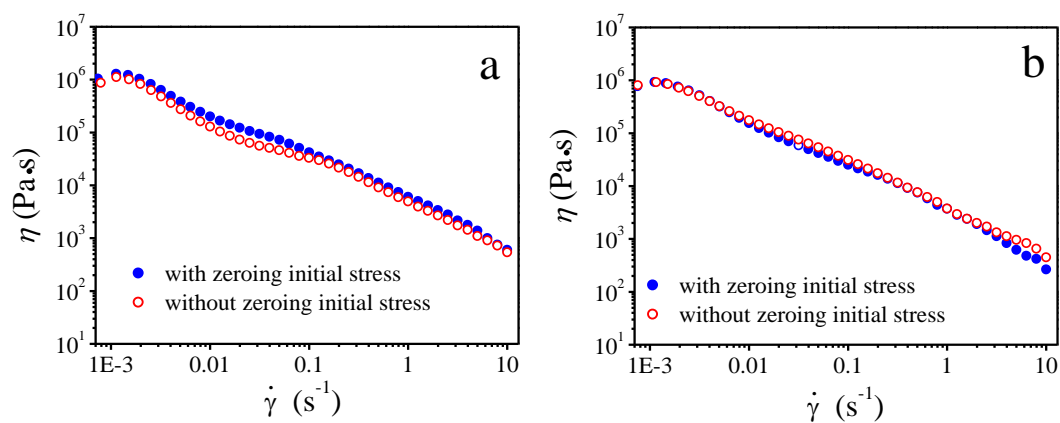

**Fig. S2** Changes of steady shear viscosity with shear rate for the 5.0 wt% CNT/iPP nanocomposite under different test conditions of (a) in a 25 mm parallel plates geometry, and (b) in a 25 mm cone-and-plate geometry.
